# Supplementary material for: Absence of Sigma 1 Receptor Accelerates Photoreceptor Cell Death in a Murine Model of Retinitis Pigmentosa
Source: PubMed Central journal article supplement (PMC5586962; doi:10.1167/iovs.17-21947), 2017-09
Supplement: iovs-58-10-56_s01.pdf [file iovs-58-10-56_s01.pdf]

**Supplementary Table S1. Numbers and ages of animals used in the study.**

| <b>Mouse group</b>                                                                               | <b>n</b> | <b>Age (post-natal days)</b> |
|--------------------------------------------------------------------------------------------------|----------|------------------------------|
| <b><i>ERG analysis of retinal function</i></b>                                                   |          |                              |
| <i>Wild-type</i>                                                                                 | 5        | 28                           |
| <i>Rd10</i>                                                                                      | 6        | 28                           |
| <i>Rd10/Sig1R<sup>-/-</sup></i>                                                                  | 8        | 28                           |
| <b><i>OCT and JB4 morphometric analysis of retinal structure</i></b>                             |          |                              |
| <i>Wild-type</i>                                                                                 | 4        | 15                           |
| <i>Rd10</i>                                                                                      | 4        | 15                           |
| <i>Rd10/Sig1R<sup>-/-</sup></i>                                                                  | 4        | 15                           |
| <i>Wild-type</i>                                                                                 | 4        | 18                           |
| <i>Rd10</i>                                                                                      | 4        | 18                           |
| <i>Rd10/Sig1R<sup>-/-</sup></i>                                                                  | 4        | 18                           |
| <i>Wild-type</i>                                                                                 | 8        | 21                           |
| <i>Rd10</i>                                                                                      | 8        | 21                           |
| <i>Rd10/Sig1R<sup>-/-</sup></i>                                                                  | 9        | 21                           |
| <i>Wild-type</i>                                                                                 | 4        | 24                           |
| <i>Rd10</i>                                                                                      | 4        | 24                           |
| <i>Rd10/Sig1R<sup>-/-</sup></i>                                                                  | 4        | 24                           |
| <i>Wild-type</i>                                                                                 | 8        | 28                           |
| <i>Rd10</i>                                                                                      | 8        | 28                           |
| <i>Rd10/Sig1R<sup>-/-</sup></i>                                                                  | 8        | 28                           |
| <i>Wild-type</i>                                                                                 | 8        | 35                           |
| <i>Rd10</i>                                                                                      | 9        | 35                           |
| <i>Rd10/Sig1R<sup>-/-</sup></i>                                                                  | 12       | 35                           |
| <i>Wild-type</i>                                                                                 | 8        | 42                           |
| <i>Rd10</i>                                                                                      | 8        | 42                           |
| <i>Rd10/Sig1R<sup>-/-</sup></i>                                                                  | 13       | 42                           |
| <b><i>Immunohistochemistry and H&amp;E cryosection</i></b>                                       |          |                              |
| <i>Wild-type</i>                                                                                 | 5        | 28                           |
| <i>Rd10</i>                                                                                      | 5        | 28                           |
| <i>Rd10/Sig1R<sup>-/-</sup></i>                                                                  | 5        | 28                           |
| <i>Wild-type</i>                                                                                 | 5        | 35                           |
| <i>Rd10</i>                                                                                      | 6        | 35                           |
| <i>Rd10/Sig1R<sup>-/-</sup></i>                                                                  | 6        | 35                           |
| <b><i>Assessment of microglia activation and PNA-labeled cones in flat mount preparation</i></b> |          |                              |
| <i>Wild-type</i>                                                                                 | 7        | 35                           |
| <i>Rd10</i>                                                                                      | 8        | 35                           |
| <i>Rd10/Sig1R<sup>-/-</sup></i>                                                                  | 10       | 35                           |
| <b><i>Detection of ER stress and oxidative stress related genes and proteins</i></b>             |          |                              |
| <i>Wild-type</i>                                                                                 | 15       | 21                           |
| <i>Rd10</i>                                                                                      | 18       | 21                           |
| <i>Rd10/Sig1R<sup>-/-</sup></i>                                                                  | 20       | 21                           |
