# Supplementary material for: Absence of Sigma 1 Receptor Accelerates Photoreceptor Cell Death in a Murine Model of Retinitis Pigmentosa
Source: PubMed Central journal article supplement (PMC5586962; doi:10.1167/iovs.17-21947), 2017-09
Supplement: iovs-58-10-56_s02.pdf [file iovs-58-10-56_s02.pdf]

**Supplementary Table S2. Antibodies used in immunohistochemical, flatmount and immunoblotting studies.**

| <b>Antibody</b>                            | <b>Supplier</b>                 | <b>Dilution</b> |
|--------------------------------------------|---------------------------------|-----------------|
| <b>Primary</b>                             |                                 |                 |
| FITC-conjugated peanut agglutinin (L-7381) | Sigma, St. Louis, MO            | 1:100           |
| Rabbit anti-GFAP (Z0334)                   | Dako , Carpentaria, CA          | 1:500           |
| Rabbit anti-Iba-1 (019-19741)              | Wako, VA                        | 1:200           |
| Rabbit anti-IRE1 $\alpha$ (14C10)          | Cell Signaling, MA              | 1:1000          |
| Rabbit anti-XBP1 (12782S)                  | Cell Signaling, MA              | 1:1000          |
| Rabbit anti-ATF4 (11815S)                  | Cell Signaling, MA              | 1:1000          |
| Mouse anti-CHOP (2895P)                    | Cell Signaling, MA              | 1:1000          |
| Rabbit anti-Bip (3177P)                    | Cell Signaling, MA              | 1:1000          |
| Rabbit anti-PERK (3192S)                   | Cell Signaling, MA              | 1:1000          |
| Mouse anti-GAPDH (MAB374)                  | EMD Millipore, MA               | 1:5000          |
| Mouse anti-IP3R3 (610312)                  | BD Bioscience, CA               | 1:1000          |
| Rabbit anti-p-eIF2 $\alpha$ (3398P)        | Cell Signaling, MA              | 1:1000          |
| Rabbit anti-eIF2 $\alpha$ (5324P)          | Cell Signaling, MA              | 1:1000          |
| Rabbit anti-Nrf2 (ab31163)                 | Abcam, MA                       | 1:800           |
| Goat anti-KEAP1 (SC-15246)                 | Santa Cruz, CA                  | 1:800           |
| Rabbit anti-SOD1 (SC-11407)                | Santa Cruz, CA                  | 1:1000          |
| Rabbit anti-Catalase (SC-50508)            | Santa Cruz, CA                  | 1:800           |
| Rabbit anti-NQO1 (ab34173)                 | Abcam, MA                       | 1:1000          |
| Rabbit anti-HMOX1 (SC-10789)               | Santa Cruz, CA                  | 1:500           |
| Rabbit anti- $\beta$ -Actin (8457P)        | Cell Signaling, MA              | 1:1000          |
| <b>Secondary</b>                           |                                 |                 |
| Alexa Fluo 488 anti-rabbit IgG (H+L)       | Invitrogen Molecular Probes, NY | 1:1000          |
| Goat anti-Rabbit IgG-HRP (SC-2004)         | Santa Cruz, CA                  | 1:1000          |
| Goat anti-Mouse IgG-HRP (SC-2005)          | Santa Cruz, CA                  | 1:1000          |
| Donkey anti-Goat IgG-HRP (SC-2020)         | Santa Cruz, CA                  | 1:1000          |
