# Supplementary material for: Absence of Sigma 1 Receptor Accelerates Photoreceptor Cell Death in a Murine Model of Retinitis Pigmentosa
Source: PubMed Central journal article supplement (PMC5586962; doi:10.1167/iovs.17-21947), 2017-09
Supplement: iovs-58-10-56_s03.pdf [file iovs-58-10-56_s03.pdf]

**Supplementary Table S3. Sequences of primers used for real-time Q-RT-PCR**

| <b>Gene</b>     | <b>NCBI Accession Number</b> |         | <b>Primer Sequence</b>        | <b>size (bp)</b> |
|-----------------|------------------------------|---------|-------------------------------|------------------|
| <i>Irela</i>    | NM_023913                    | Forward | 5'-ACACCGACCACCGTATCTCA-3'    | 110              |
|                 |                              | Reverse | 5'-CTCAGGATAATGGTAGCCATGTC-3' |                  |
| <i>Xbp1</i>     | NM_013842                    | Forward | 5'-AGCAGCAAGTGGTGGATTTG-3'    | 75               |
|                 |                              | Reverse | 5'-GAGTTTTCTCCCGTAAAAGCTGA-3' |                  |
| <i>Atf4</i>     | NM_009716                    | Forward | 5'-AAGGAGGAAGACACTCCCTCT-3'   | 169              |
|                 |                              | Reverse | 5'-CAGGTGGGTCATAAGGTTTGG-3'   |                  |
| <i>Chop</i>     | NM_007837                    | Forward | 5'-CTGGAAGCCTGGTATGAGGAT-3'   | 121              |
|                 |                              | Reverse | 5'-CAGGGTCAAGAGTAGTGAAGGT-3'  |                  |
| <i>Bip</i>      | NM_022310                    | Forward | 5'-ACTTGGGGACCACCTATTCCT-3'   | 134              |
|                 |                              | Reverse | 5'-ATCGCCAATCAGACGCTCC-3'     |                  |
| <i>Perk</i>     | NM_010121                    | Forward | 5'-AGTCCCTGCTCGAATCTTCCT-3'   | 125              |
|                 |                              | Reverse | 5'-TCCCAAGGCAGAACAGATATACC-3' |                  |
| <i>Ip3r3</i>    | NM_080553                    | Forward | 5'-GGGCGCAGAACAACGAGAT-3'     | 104              |
|                 |                              | Reverse | 5'-GAAGTTTTGCAGGTACGGTT-3'    |                  |
| <i>Atf6</i>     | NM_001081304                 | Forward | 5'-AGCGCCCAAGACTCAAACC-3'     | 109              |
|                 |                              | Reverse | 5'-CTGTATGCTGATAATCGACTGCT-3' |                  |
| <i>Nrf2</i>     | NM_010902                    | Forward | 5'-TAGATGACCATGAGTCGCTTGC-3'  | 153              |
|                 |                              | Reverse | 5'-GCCAAACTTGCTCCATGTCC-3'    |                  |
| <i>Keap1</i>    | NM_016679                    | Forward | 5'-TGCCCCTGTGGTCAAAGTG-3'     | 104              |
|                 |                              | Reverse | 5'-GGTTCGGTTACCGTCCTGC-3'     |                  |
| <i>Sod1</i>     | NM_011434                    | Forward | 5'-AACCAGTTGTGTTGTCAGGAC-3'   | 139              |
|                 |                              | Reverse | 5'-CCACCATGTTTCTTAGAGTGAGG-3' |                  |
| <i>Catalase</i> | NM_009804                    | Forward | 5'-AGCGACCAGATGAAGCAGTG-3'    | 181              |
|                 |                              | Reverse | 5'-TCCGCTCTCTGTCAAAGTGTG-3'   |                  |
| <i>Nqo1</i>     | NM_008706                    | Forward | 5'-AGGATGGGAGGTACTCGAATC-3'   | 144              |
|                 |                              | Reverse | 5'-AGGCGTCCTTCCTTATATGCTA-3'  |                  |
| <i>Gpx1</i>     | NM_008160                    | Forward | 5'-AGTCCACCGTGTATGCCTTCT-3'   | 105              |
|                 |                              | Reverse | 5'-GAGACGCGACATTCTCAATGA-3'   |                  |
| <i>Hmox1</i>    | NM_010442                    | Forward | 5'-AAGCCGAGAATGCTGAGTTCA-3'   | 100              |
|                 |                              | Reverse | 5'-GCCGTGTAGATATGGTACAAGGA-3' |                  |
| <i>Gstt3</i>    | NM_133994                    | Forward | 5'-GGATGGGGACTTCGTCTTGG-3'    | 219              |
|                 |                              | Reverse | 5'-TCAGGAGGTACGGGCTGTC-3'     |                  |
| <i>Gapdh</i>    | NM_008084                    | Forward | 5'-AGGTCGGTGTGAACGGATTTG-3'   | 123              |
|                 |                              | Reverse | 5'-TGTAGACCATGTAGTTGAGGTCA-3' |                  |
